# Supplementary material for: Can organic matter flux profiles be diagnosed using remineralisation rates derived from observed tracers and modelled ocean transport rates?
Source: Copernicus journal article supplement (doi:10.5194/bg-12-5547-2015), 2015-09-30
Supplement: Supplementary file 1 [file bg-12-5547-2015-supplement.zip]

## **Supplementary Material**

This supplementary material contains descriptions of the ensemble of 54 runs in the Earth system model GENIE used to simulate the uncertainty in estimating remineralisation rates arising from  
5 using model circulation rates. Table 1 contains details on the parameters varied, table 2 details differences in overturning circulation and figure 1 shows a comparison of the salinity and temperature fields from each ensemble member with the standard configuration of GENIE.

## Context of Transport Matrices in GENIE

- 10 The Transport Matrix as described in Khatiwala *et al.*, (2005) and Khatiwala (2007) contains the finite difference tendency calculated in an ocean model:

$$\frac{d\mathbf{c}}{dt} = \frac{\mathbf{c}^{n+1} - \mathbf{c}^n}{\Delta t} = \mathbf{A}'^n \mathbf{c}^n + \mathbf{q}'^n \quad (1)$$

- where  $\mathbf{A}'$  is the transport matrix containing the finite difference tendencies ( $\text{dt}^{-1}$ ),  $\mathbf{c}$  is a tracer ( $\text{mol kg}^{-1}$ ) and  $\mathbf{q}'$  is a vector of source/sinks ( $\text{mol kg}^{-1} \text{ dt}^{-1}$ ). The superscripts ( $n$ ) refer to the time step index. Rearranging Equation (1) for  $\mathbf{c}^{n+1}$ :
- 15

$$\mathbf{c}^{n+1} = (\mathbf{I} + \mathbf{A}' \Delta t) \mathbf{c}^n + \mathbf{q}'^n \Delta t \quad (2)$$

- Equation (2) predicts the tracer field after one timestep ( $\mathbf{c}^{n+1}$ ) from the effect of ocean circulation ( $\mathbf{I} + \mathbf{A}' \Delta t$ ) on the tracer at the previous timestep ( $\mathbf{c}^n$ ) plus any sources or sinks for the tracer over the timestep ( $\mathbf{q}'^n \Delta t$ ). In GENIE each tracer experiment diagnoses the tracer distribution resulting from the modelled ocean circulation acting on a unit concentration in a single grid-box, i.e.,  $1 \text{ mol kg}^{-1}$ , after one time step. The resulting concentrations form the coefficients in each column. Therefore, the GENIE transport matrix ( $\mathbf{A}$ ) described and used in this study is equivalent to  $(\mathbf{I} + \mathbf{A}' \Delta t)$  from equation (2).
- 20

## Supplementary Tables and Figures

Table 1: Parameters values from the GENIE ensemble used in this study from Annan et al. (2005). The parameter values for the standard 8-level model in Ridgwell et al. (2007) are also shown.

| Parameter                | Reference | Min.                   | Max.                   | SYN                   |
|--------------------------|-----------|------------------------|------------------------|-----------------------|
| <i>Ocean</i>             |           |                        |                        |                       |
| temp0                    | go_10     | 10.115                 | 24.904                 | 0.000                 |
| temp1                    | go_11     | 10.115                 | 24.904                 | 0.000                 |
| rel                      | go_12     | 0.9                    | 0.9                    | 0.9                   |
| sc_tau                   | go_13     | 1.078                  | 2.320                  | 1.932                 |
| iso                      | go_14     | 2480.917               | 6496.541               | 4488.812              |
| dia                      | go_15     | $5.13 \times 10^{-6}$  | $5.14 \times 10^{-5}$  | $2.72 \times 10^{-5}$ |
| inverse minimum drag     | go_16     | 1.853                  | 4.565                  | 2.940                 |
| <i>Atmosphere</i>        |           |                        |                        |                       |
| atm. Diff. amp. T        | ea_12     | 3045602                | 5357693                | 4667550               |
| atm. Diff. amp. Q        | ea_13     | 1274689                | 2162105                | 1097107               |
| dist 'n' width           | ea_14     | 0.923                  | 2.005                  | 1.083                 |
| slope                    | ea_15     | $4.89 \times 10^{-3}$  | $1.48 \times 10^{-1}$  | $6.33 \times 10^{-2}$ |
| T_z                      | ea_16     | $-2.40 \times 10^{-3}$ | $2.30 \times 10^{-1}$  | $1.12 \times 10^{-1}$ |
| q_z                      | ea_18     | $4.21 \times 10^{-2}$  | $2.30 \times 10^{-1}$  | $2.27 \times 10^{-1}$ |
| q_m                      | ea_19     | $4.21 \times 10^{-2}$  | $2.30 \times 10^{-1}$  | $2.27 \times 10^{-1}$ |
| extra1a                  | ea_25     | $-4.29 \times 10^{-2}$ | $-2.60 \times 10^{-2}$ | $2.12 \times 10^{-2}$ |
| extra1b                  | ea_26     | $1.48 \times 10^{-1}$  | $2.43 \times 10^{-1}$  | $1.20 \times 10^{-1}$ |
| extra1c                  | ea_27     | $1.56 \times 10^{-1}$  | $2.58 \times 10^{-1}$  | $1.27 \times 10^{-1}$ |
| <i>Ice</i>               |           |                        |                        |                       |
| sea-ice eddy diffusivity | gs_11     | 2023.114               | 8000                   | 6200                  |

Table 2: Minimum and maximum overturning circulations (Sv) for each ensemble member from Annan et al. (2005) and for the standard GENIE configuration corresponding to the SYN dataset (Ridgwell et al. 2007) calculated at the end of the 10000 year spin-up.

| Ens. Member | Global Min. | Global Max. | Atlantic Min. | Atlantic Max |
|-------------|-------------|-------------|---------------|--------------|
| 1           | -44.984     | 44.424      | -1.145        | 20.013       |
| 2           | -42.595     | 41.983      | -1.009        | 20.767       |
| 3           | -48.919     | 48.096      | -0.471        | 17.1         |
| 4           | -37.221     | 36.743      | -0.781        | 17.913       |
| 5           | -40.909     | 37.746      | -0.965        | 18.436       |
| 6           | -44.138     | 41.438      | -0.964        | 18.519       |
| 7           | -41.648     | 39.93       | -1.199        | 20.104       |
| 8           | -33.106     | 30.128      | -0.773        | 16.518       |
| 9           | -37.825     | 35.532      | -0.968        | 16.697       |
| 10          | -38.763     | 38.677      | -0.976        | 17.562       |
| 11          | -45.308     | 43.577      | -0.918        | 17.668       |
| 12          | -43.51      | 41.387      | -1.12         | 17.875       |
| 13          | -36.348     | 32.935      | -0.91         | 16.756       |
| 14          | -40.963     | 38.4        | -0.918        | 17.543       |
| 15          | -35.481     | 33.514      | -0.771        | 16.994       |
| 16          | -36.058     | 35.122      | -1.213        | 19.245       |

*Continued on next page*

*Continued from previous page*

| <b>Ens. Member</b> | <b>Global Min.</b> | <b>Global Max.</b> | <b>Atlantic Min.</b> | <b>Atlantic Max</b> |
|--------------------|--------------------|--------------------|----------------------|---------------------|
| 17                 | -45.322            | 40.9               | -1.287               | 18.462              |
| 18                 | -36.093            | 33.451             | -1.123               | 17.622              |
| 19                 | -43.719            | 41.425             | -0.97                | 17.7                |
| 20                 | -39.29             | 36.775             | -1.02                | 18.446              |
| 21                 | -46.585            | 43.208             | -0.946               | 17.063              |
| 22                 | -46.512            | 40.972             | -1.605               | 22.607              |
| 23                 | -44.881            | 41.41              | -0.891               | 16.35               |
| 24                 | -43.417            | 42.392             | -0.888               | 15.656              |
| 25                 | -41.159            | 37.946             | -0.979               | 17.759              |
| 26                 | -38.099            | 36.185             | -1.279               | 18.826              |
| 27                 | -40.831            | 37.522             | -0.907               | 16.188              |
| 28                 | -36.051            | 32.139             | -1.267               | 17.629              |
| 29                 | -41.826            | 39.273             | -1.015               | 18.428              |
| 30                 | -39.999            | 37.343             | -0.883               | 16.047              |
| 31                 | -44.028            | 43.078             | -1.128               | 18.89               |
| 32                 | -40.015            | 38.424             | -0.946               | 17.374              |
| 33                 | -45.535            | 41.939             | -0.975               | 17.5                |
| 34                 | -37.05             | 33.947             | -0.933               | 18.752              |
| 35                 | -46.752            | 43.682             | -2.142               | 19.603              |
| 36                 | -40.286            | 37.239             | -2.18                | 18.173              |
| 37                 | -44.404            | 42.344             | -0.639               | 16.259              |
| 38                 | -38.082            | 37.064             | -1.052               | 16.523              |
| 39                 | -39.32             | 36.908             | -2.129               | 17.893              |
| 40                 | -34.405            | 32.641             | -1.369               | 18.476              |
| 41                 | -38.175            | 38.101             | -0.912               | 19.18               |
| 42                 | -39.147            | 37.322             | -1.099               | 18.696              |
| 43                 | -45.06             | 40.854             | -1.08                | 19.603              |
| 44                 | -43.422            | 42.015             | -1.049               | 18.123              |
| 45                 | -50.089            | 44.883             | -0.997               | 18.595              |
| 46                 | -40.868            | 36.177             | -0.942               | 19.541              |
| 47                 | -42.207            | 39.9               | -0.51                | 15.787              |
| 48                 | -36.276            | 32.168             | -2.061               | 18.242              |
| 49                 | -41.262            | 37.757             | -0.995               | 17.64               |
| 50                 | -42.064            | 39.877             | -0.827               | 16.787              |
| 51                 | -41.28             | 37.355             | -1.025               | 16.997              |
| 52                 | -39.448            | 37.092             | -1.142               | 17.869              |
| 53                 | -36.709            | 32.89              | -0.705               | 15.349              |
| 54                 | -42.012            | 39.44              | -1.308               | 17.956              |
| SYN                | -44.751            | 40.226             | -0.177               | 18.221              |

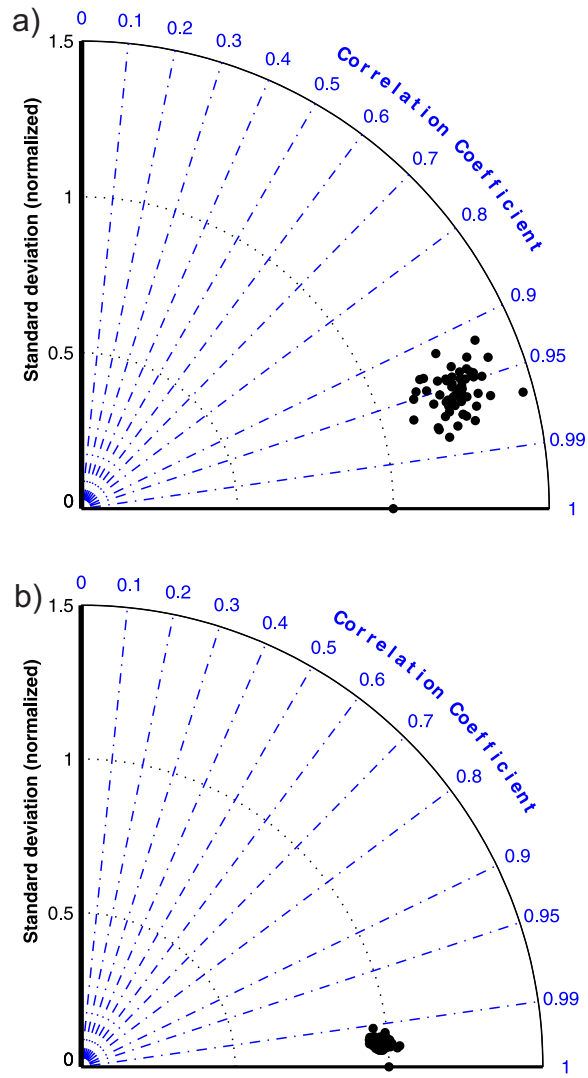

Figure 1: Taylor diagram comparison of the perturbed physics ensemble (Annan et al. 2005) versus the standard configuration of GENIE (Ridgwell et al. 2007) used for the synthetic data for (a) salinity and (b) temperature.

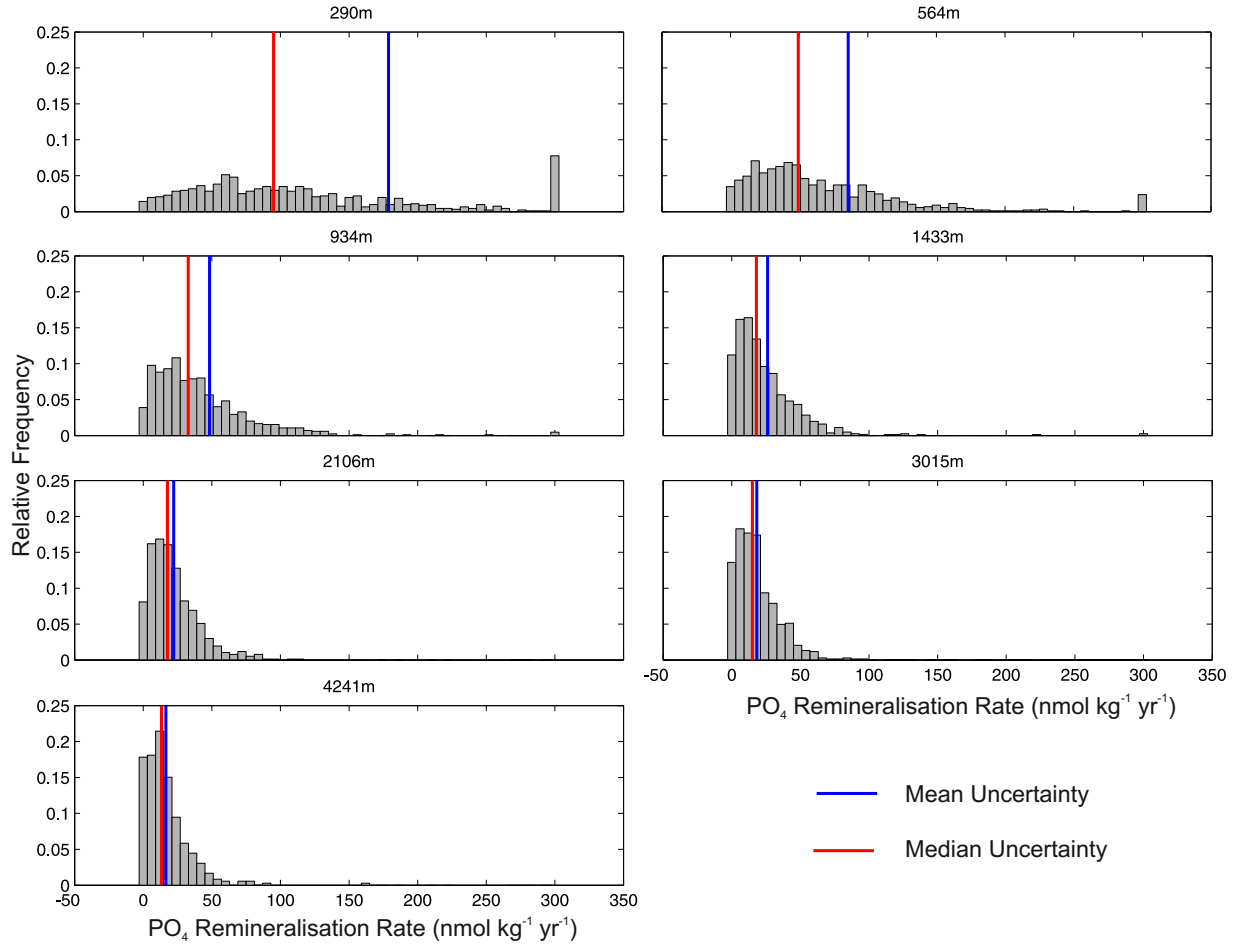

Figure 2: Histograms showing the distribution, mean and median standard deviation of estimated  $\text{PO}_4$  remineralisation rates when simulating uncertainty associated with observations as shown in Figure 8 for each depth level in GENIE. The histograms show the distribution standard deviations calculated for all grid-boxes at that depth level when observation uncertainty is simulated. The blue and red lines indicate the mean and median respectively corresponding with the values shown in Figure 8. Histograms are shown with a relative frequency as the number of samples is different between depth levels. Values  $> 300 \text{ nmol kg}^{-1} \text{ yr}^{-1}$  are included in the last bin.

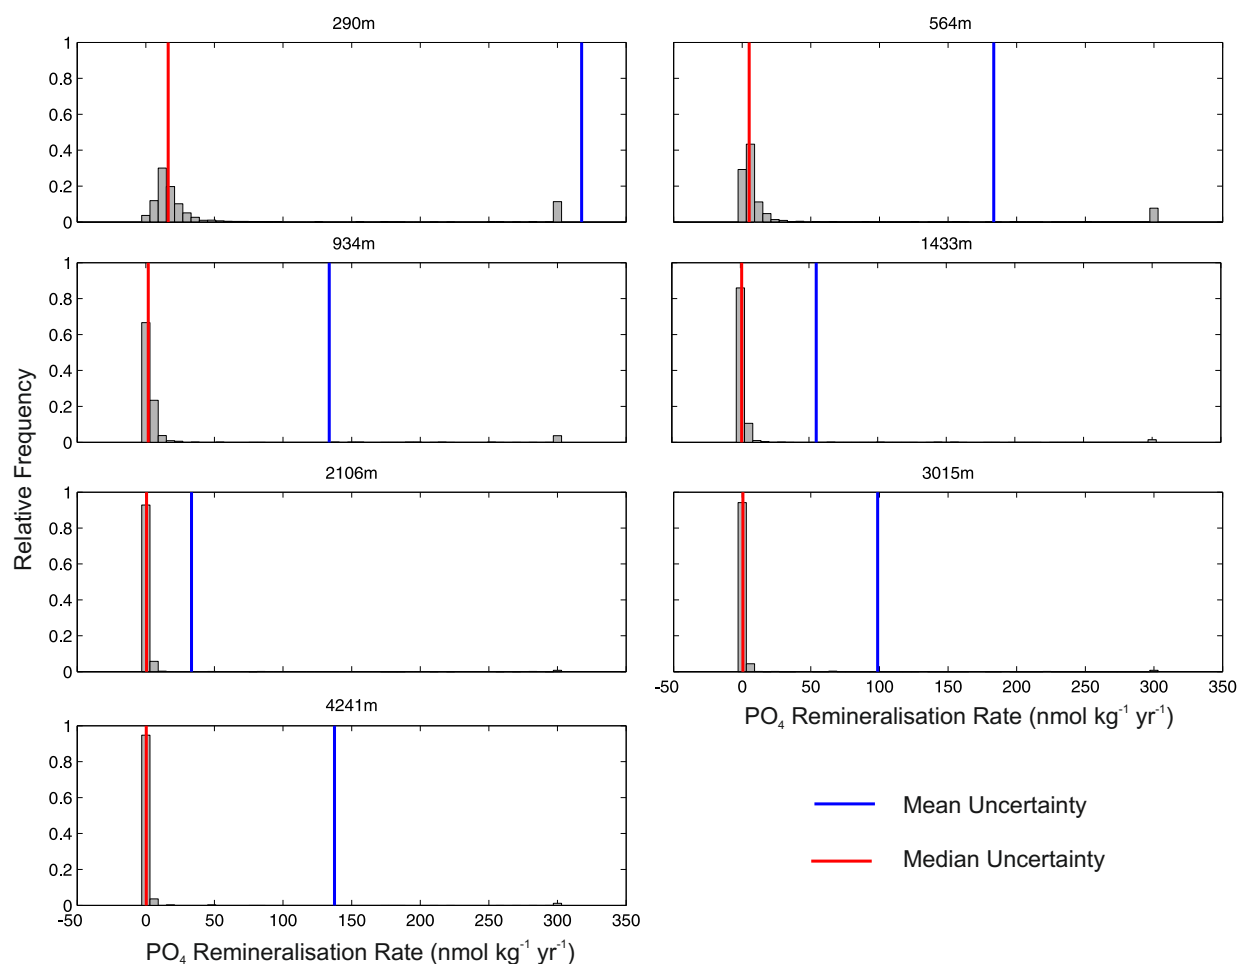

Figure 3: As per Figure 2 in supplementary material but for uncertainty associated with circulation. Note the figures are comparable except for the change in relative frequency magnitude shown.

## 25 References

- Annan, J., J. Hargreaves, N. Edwards, and R. Marsh (2005), Parameter estimation in an intermediate complexity earth system model using an ensemble kalman filter, *Ocean Modelling*, 8 (1-2), 135-154
- Khatiwala, S., M. Visbeck, and M.A. Cane (2005) Accelerated simulation of passive tracers in ocean circulation models. *Ocean Modelling*. 9 (1), pp. 51 - 69
- Khatiwala, S. (2007) A computational framework for simulation of biogeochemical tracers in the ocean. *Global Biogeochemical Cycles*. 21 (3), GB3001
- Ridgwell, A., I. Zondervan, J. Hargreaves, J. Bijma, and T. Lenton, (2007) Assessing the potential long-term increase of oceanic fossil fuel  $\text{CO}_2$  uptake due to 'CO<sub>2</sub>-calcification feedback', *Biogeosciences* 4, 481-492.
