# Supplementary material for: Can organic matter flux profiles be diagnosed using remineralisation rates derived from observed tracers and modelled ocean transport rates?
Source: Copernicus journal article supplement (doi:10.5194/bg-12-5547-2015), 2015-09-30
Supplement: Supplementary file 2 [file bg-12-5547-2015-supplement.zip]

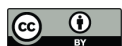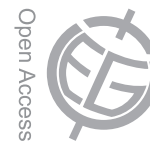

## *Supplement of*

# **Can organic matter flux profiles be diagnosed using remineralisation rates derived from observed tracers and modelled ocean transport rates?**

**J. D. Wilson et al.**

*Correspondence to:* J. D. Wilson ([wilsonjd@cardiff.ac.uk](mailto:wilsonjd@cardiff.ac.uk))

- [bg-12-5547-2015-supplement-title-page.pdf](#)
- [Example\\_Script.m](#)
- [Supplementary\\_Matlab\\_Files.mat](#)
- [supplementary\\_material.pdf](#)
- [v2f.m](#)

The copyright of individual parts of the supplement might differ from the CC-BY 3.0 licence.
